# Supplementary material for: Combined Analyses of the ITS Loci and the Corresponding 16S rRNA Genes Reveal High Micro- and Macrodiversity of SAR11 Populations in the Red Sea
Source: PubMed Central journal article supplement (PMC3502338; doi:10.1371/journal.pone.0050274), 2012-11-20

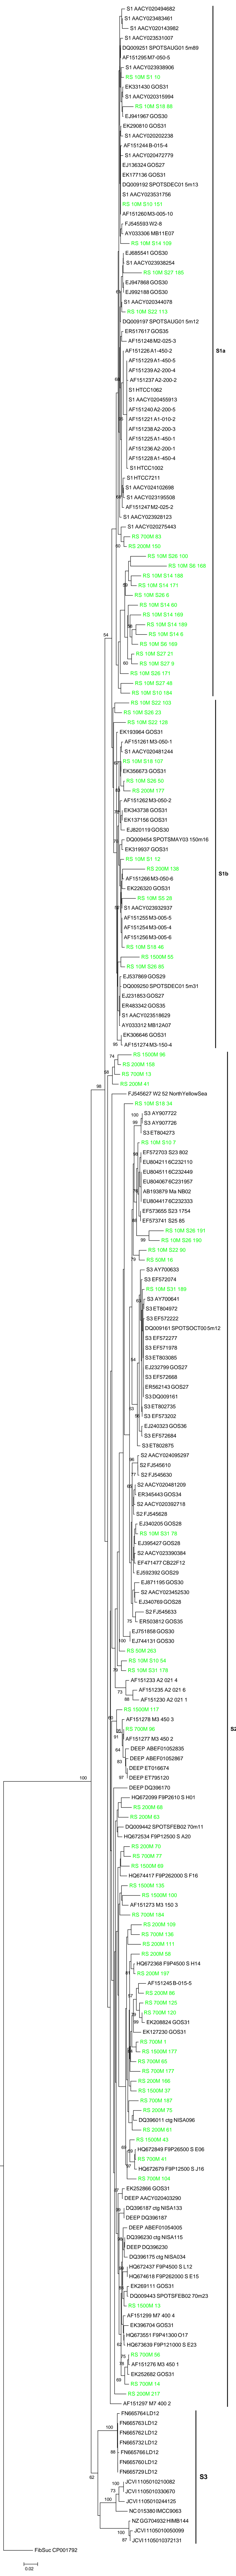

S1a

S1b

S2

S3

FibSuc CP001792

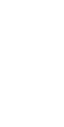

Supplement: pone.0050274.s004.pdf [file pone.0050274.s004.pdf]
