# Supplementary material for: Combined Analyses of the ITS Loci and the Corresponding 16S rRNA Genes Reveal High Micro- and Macrodiversity of SAR11 Populations in the Red Sea
Source: PubMed Central journal article supplement (PMC3502338; doi:10.1371/journal.pone.0050274), 2012-11-20
Supplement: pone.0050274.s006.pdf [file pone.0050274.s006.pdf]

**Table S1.** Environmental and physico-chemical traits of seawater samples used for clone libraries in our study.

| Transect <sup>a</sup> | Site / depth | Coordinates      | Temp. | Salinity | Dissolved O <sub>2</sub> | Chl a <sup>b</sup>    | PIC <sup>b</sup>       | POC <sup>c</sup>      |
|-----------------------|--------------|------------------|-------|----------|--------------------------|-----------------------|------------------------|-----------------------|
|                       |              | Lat. N / Long. E | (°C)  | (psu)    | (µm l <sup>-1</sup> )    | (mg m <sup>-3</sup> ) | (mol m <sup>-3</sup> ) | (mg m <sup>-3</sup> ) |
| 1                     | Coastal      | 27.82 / 35.08    | 24.23 | 40.00    | 178                      | 0.150                 | 0.000031               | 46.44                 |
|                       | Open ocean   | 27.44 / 34.82    | 23.80 | 40.04    | 178                      | 0.133                 | 0.000061               | 41.69                 |
| 2                     | Coastal      | 27.25 / 35.62    | 24.40 | 39.89    | 176                      | 0.125                 | 0.000158               | 43.57                 |
|                       | Open ocean   | 26.91 / 35.14    | 23.92 | 39.99    | 177                      | 0.131                 | 0.000134               | 44.77                 |
| 3                     | Coastal      | 25.89 / 36.49    | 25.05 | 39.72    | 174                      | 0.158                 | 0.000138               | 50.73                 |
|                       | Open ocean   | 25.66 / 35.78    | 25.35 | 39.41    | 173                      | 0.145                 | 0.000110               | 47.86                 |
| 4                     | Coastal      | 25.17 / 36.89    | 25.32 | 39.48    | 174                      | 0.153                 | 0.000117               | 49.70                 |
|                       | Open ocean   | 24.96 / 36.35    | 25.55 | 39.42    | 173                      | 0.148                 | 0.000149               | 48.54                 |
| 5                     | Open ocean   | 23.18 / 37.42    | 25.47 | 39.43    | 176                      | 0.144                 | 0.000128               | 47.75                 |
| 6                     | Coastal      | 22.26 / 38.92    | 26.68 | 39.00    | 172                      | 0.312                 | 0.000171               | 90.54                 |
|                       | Open ocean   | 22.05 / 37.98    | 26.26 | 38.59    | 173                      | 0.231                 | 0.000166               | 66.63                 |
|                       | 50 m         | 21.13 / 37.58    | 25.50 | 39.80    | 174.00                   | 0.272                 |                        |                       |
|                       | 200 m        | 21.13 / 37.58    | 22.00 | 40.40    | 124.00                   | 0.000                 |                        |                       |
|                       | 700 m        | 21.13 / 37.58    | 21.60 | 40.50    | 52.00                    | 0.000                 |                        |                       |
|                       | 1500 m       | 21.13 / 37.58    | 21.70 | 40.60    | 85.00                    | 0.000                 |                        |                       |

<sup>a</sup> For the transect samples, surface water was taken at 10-m depths.

<sup>b</sup> Satellite-based data averaged for the entire month of March 2010 (for details see, Ngugi et al., 2012).

PIC, particulate inorganic carbon; POC, particulate organic carbon.
