# Supplementary material for: Combined Analyses of the ITS Loci and the Corresponding 16S rRNA Genes Reveal High Micro- and Macrodiversity of SAR11 Populations in the Red Sea
Source: PubMed Central journal article supplement (PMC3502338; doi:10.1371/journal.pone.0050274), 2012-11-20
Supplement: pone.0050274.s007.pdf [file pone.0050274.s007.pdf]

**Table S2.** Identity of the major OTUs in our clone libraries (with an abundance of >1%) based on 16S rRNA gene, relative to each other and to cultivated strains within the SAR11 clade.

| 16S rRNA gene sequences /<br>(abundance / <i>SAR11</i> subgroup / occurrence) <sup>a</sup> | OTU1 | OTU2 | OTU3 | OTU4 | OTU5 | <i>Candidatus Pelagibacter ubique</i> <sup>b</sup> |          |          |          |
|--------------------------------------------------------------------------------------------|------|------|------|------|------|----------------------------------------------------|----------|----------|----------|
|                                                                                            |      |      |      |      |      | HTCC1062                                           | HTCC1002 | HTCC7211 | IMCC9063 |
| OTU1 (52.2%; <i>S1a</i> ; all depths)                                                      |      |      |      |      |      |                                                    |          |          |          |
| OTU2 (31.3%; <i>S1b</i> ; all depths)                                                      | 94.0 |      |      |      |      |                                                    |          |          |          |
| OTU3 (3.7%; <i>S2</i> ; all depths except 10 m)                                            | 92.6 | 91.7 |      |      |      |                                                    |          |          |          |
| OTU4 (2.7%; <i>S2</i> ; all depths except 10 m)                                            | 90.2 | 89.9 | 95.7 |      |      |                                                    |          |          |          |
| OTU5 (1.8%; <i>S2</i> ; all depths except 10 and 50 m)                                     | 93.1 | 91.9 | 96.9 | 94.4 |      |                                                    |          |          |          |
| HTCC1062                                                                                   | 98.5 | 93.3 | 92.6 | 90.8 | 93.1 |                                                    |          |          |          |
| HTCC1002                                                                                   | 98.4 | 93.2 | 92.5 | 90.6 | 92.9 | 99.8                                               |          |          |          |
| HTCC7211                                                                                   | 98.7 | 92.7 | 92.9 | 90.2 | 92.8 | 98.9                                               | 98.7     |          |          |
| IMCC9063                                                                                   | 85.7 | 82.7 | 86.6 | 86.0 | 86.2 | 85.9                                               | 85.7     | 86.3     |          |
| HIMB144                                                                                    | 85.4 | 84.2 | 85.5 | 85.2 | 85.0 | 85.4                                               | 85.2     | 84.9     | 90.6     |

<sup>a</sup> The phylogenetic positions of sequence clusters represented by OTUs **1** (*RS\_10M\_S10\_151*), **2** (*RS\_10M\_S18\_107*), **3** (*RS\_1500M\_13*), **4** (*RS\_700M\_1*), and **5** (*RS\_700M\_96*), are provided in Figure S2.

<sup>b</sup> At 16S rRNA gene level, HTCC1062, HTCC1002, and HTCC7211 belong to subgroup S1a while IMCC9063 and HIMB144 belong to subgroup 3 (Figure S2).
