# Supplementary material for: Combined Analyses of the ITS Loci and the Corresponding 16S rRNA Genes Reveal High Micro- and Macrodiversity of SAR11 Populations in the Red Sea
Source: PubMed Central journal article supplement (PMC3502338; doi:10.1371/journal.pone.0050274), 2012-11-20
Supplement: pone.0050274.s009.pdf [file pone.0050274.s009.pdf]

**Table S4.** Sample pairs with significant differences in phylotype composition based on Phylogenetic/Parsimony (P) test.

| Groups being compared (X-Y)      | Parsimony Score | Significance (P) |
|----------------------------------|-----------------|------------------|
| BATS216_20m-ETSP_SUMMER_110m     | 25              | <0.0010          |
| BATS216_50m-ETSP_SUMMER_110m     | 22              | <0.0010          |
| BATS216_100m-ETSP_SUMMER_50m     | 18              | <0.0010          |
| BATS216_20m-ETSP_SUMMER_50m      | 21              | <0.0010          |
| BATS216_50m-ETSP_SUMMER_50m      | 19              | <0.0010          |
| BATS216_20m-ETSP_WINTER_110m     | 28              | <0.0010          |
| BATS216_50m-ETSP_WINTER_110m     | 25              | <0.0010          |
| BATS216_100m-ETSP_WINTER_200m    | 12              | <0.0010          |
| BATS216_20m-ETSP_WINTER_200m     | 14              | <0.0010          |
| ETSP_SUMMER_50m-ETSP_WINTER_200m | 15              | <0.0010          |
| BATS216_100m-ETSP_WINTER_50m     | 16              | <0.0010          |
| BATS216_20m-ETSP_WINTER_50m      | 20              | <0.0010          |
| ETSP_SUMMER_110m-ETSP_WINTER_50m | 19              | <0.0010          |
| ETSP_WINTER_110m-ETSP_WINTER_50m | 21              | <0.0010          |
| ETSP_WINTER_200m-HOT186_110m     | 11              | <0.0010          |
| ETSP_WINTER_50m-HOT186_110m      | 14              | <0.0010          |
| ETSP_SUMMER_50m-HOT186_25m       | 15              | <0.0010          |
| BATS216_20m-HOT186_500m          | 24              | <0.0010          |
| BATS216_50m-HOT186_500m          | 21              | <0.0010          |
| ETSP_SUMMER_110m-HOT186_500m     | 22              | <0.0010          |
| ETSP_WINTER_200m-HOT186_500m     | 14              | <0.0010          |
| ETSP_WINTER_50m-HOT186_500m      | 18              | <0.0010          |
| ETSP_SUMMER_50m-HOT186_75m       | 18              | <0.0010          |
| BATS216_100m-MED_DCM50m          | 27              | <0.0010          |
| BATS216_20m-MED_DCM50m           | 38              | <0.0010          |
| BATS216_50m-MED_DCM50m           | 25              | <0.0010          |
| ETSP_SUMMER_110m-MED_DCM50m      | 35              | <0.0010          |
| ETSP_SUMMER_50m-MED_DCM50m       | 32              | <0.0010          |
| ETSP_WINTER_110m-MED_DCM50m      | 36              | <0.0010          |
| ETSP_WINTER_200m-MED_DCM50m      | 17              | <0.0010          |
| ETSP_WINTER_50m-MED_DCM50m       | 28              | <0.0010          |
| HOT186_110m-MED_DCM50m           | 20              | <0.0010          |
| HOT186_25m-MED_DCM50m            | 18              | <0.0010          |
| HOT186_500m-MED_DCM50m           | 25              | <0.0010          |
| HOT186_75m-MED_DCM50m            | 25              | <0.0010          |
| BATS216_100m-MVD_4908m           | 15              | <0.0010          |
| BATS216_20m-MVD_4908m            | 19              | <0.0010          |
| BATS216_50m-MVD_4908m            | 14              | <0.0010          |
| ETSP_SUMMER_110m-MVD_4908m       | 17              | <0.0010          |
| ETSP_SUMMER_50m-MVD_4908m        | 13              | <0.0010          |
| ETSP_WINTER_110m-MVD_4908m       | 22              | <0.0010          |
| ETSP_WINTER_200m-MVD_4908m       | 11              | <0.0010          |
| ETSP_WINTER_50m-MVD_4908m        | 12              | <0.0010          |
| HOT186_110m-MVD_4908m            | 13              | <0.0010          |
| HOT186_25m-MVD_4908m             | 12              | <0.0010          |
| HOT186_500m-MVD_4908m            | 15              | <0.0010          |
| HOT186_75m-MVD_4908m             | 11              | <0.0010          |
| MED_DCM50m-MVD_4908m             | 51              | <0.0010          |
| BATS216_100m-MarSea_1000m        | 10              | <0.0010          |
| BATS216_20m-MarSea_1000m         | 12              | <0.0010          |
| BATS216_50m-MarSea_1000m         | 9               | <0.0010          |
| ETSP_SUMMER_110m-MarSea_1000m    | 9               | <0.0010          |
| ETSP_SUMMER_50m-MarSea_1000m     | 11              | <0.0010          |
| ETSP_WINTER_110m-MarSea_1000m    | 11              | <0.0010          |
| ETSP_WINTER_200m-MarSea_1000m    | 8               | <0.0010          |
| ETSP_WINTER_50m-MarSea_1000m     | 9               | <0.0010          |
| HOT186_25m-MarSea_1000m          | 9               | <0.0010          |
| HOT186_75m-MarSea_1000m          | 8               | <0.0010          |
| MVD_4908m-MarSea_1000m           | 18              | <0.0010          |
| BATS216_100m-PRT_6000m           | 28              | <0.0010          |
| BATS216_20m-PRT_6000m            | 33              | <0.0010          |
| BATS216_50m-PRT_6000m            | 25              | <0.0010          |
| ETSP_SUMMER_110m-PRT_6000m       | 39              | <0.0010          |
| ETSP_SUMMER_50m-PRT_6000m        | 25              | <0.0010          |
| ETSP_WINTER_110m-PRT_6000m       | 45              | <0.0010          |
| ETSP_WINTER_200m-PRT_6000m       | 24              | <0.0010          |
| ETSP_WINTER_50m-PRT_6000m        | 21              | <0.0010          |
| HOT186_110m-PRT_6000m            | 19              | <0.0010          |
| HOT186_25m-PRT_6000m             | 17              | <0.0010          |
| HOT186_500m-PRT_6000m            | 34              | <0.0010          |
| HOT186_75m-PRT_6000m             | 25              | <0.0010          |
| MED_DCM50m-PRT_6000m             | 120             | <0.0010          |
| MVD_4908m-PRT_6000m              | 58              | <0.0010          |
| BATS216_100m-RS1500m             | 8               | <0.0010          |
| BATS216_20m-RS1500m              | 8               | <0.0010          |
| BATS216_50m-RS1500m              | 8               | <0.0010          |
| ETSP_SUMMER_50m-RS1500m          | 12              | <0.0010          |
| ETSP_WINTER_50m-RS1500m          | 10              | <0.0010          |
| HOT186_110m-RS1500m              | 8               | <0.0010          |
| HOT186_25m-RS1500m               | 8               | <0.0010          |
| HOT186_75m-RS1500m               | 8               | <0.0010          |
| MED_DCM50m-RS1500m               | 10              | <0.0010          |
| MVD_4908m-RS1500m                | 8               | <0.0010          |
| ETSP_SUMMER_110m-RS50m           | 32              | <0.0010          |
| MED_DCM50m-RS50m                 | 41              | <0.0010          |
| MVD_4908m-RS50m                  | 18              | <0.0010          |
| MarSea_1000m-RS50m               | 10              | <0.0010          |
| PRT_6000m-RS50m                  | 39              | <0.0010          |
| RS1500m-RS50m                    | 11              | <0.0010          |

Only comparisons which were significantly different are shown.

The phylotype composition for most samples differ from ETSP samples, which are characterized by moderately low temperature and suboxic conditions.

The second separation is between "surface" vs. deep-sea samples (e.g., RS1500m, PRT\_6000m, MarSea\_1000m, etc.).
